## Corrections

*Regulation of NF- $\kappa$ B by atypical activators and tumour suppressors*

By N.D. PERKINS

Volume 32 Part 6 (2004) 936–939

ARF was incorrectly defined as ADP-ribosylation factor. In the context of this paper, it should be defined as alternative reading frame.

*Trehalose metabolism and sugar sensing in plants*

By N. AVONCE, B. LEYMAN, J. THEVELEIN and G. ITURRIAGA

Volume 33 Part 1 (2005) 276–279

On page 279, the acknowledgements were omitted. These should read as follows: This work was supported by the European Union International Cooperation (grant no. CA4-CT-2000-30041) to G.I., and the Flanders Interuniversity Institute for Biotechnology (VIB), the Fund for Scientific Research – Flanders and the Research Fund of the Katholieke Universiteit Leuven (Concerted Research Actions) to B.L. and J.T. B.L. is a postdoctoral fellow of the Fund for Scientific Research (Flanders, FWO).
